# Supplementary material
Source: PubMed Central journal article supplement (PMC6712525)
Supplement: baADV2019000298-suppl1.pdf [file baADV2019000298-suppl1.pdf]

## Supplemental data

### Supplemental methods

Mononuclear cells were stained with fluorescent antibodies, acquired on a BD FACScan flow cytometer, and analyzed using FlowJo software. All cells were stained with CD3 PerCP (BD 347304; clone SK7) and CD56 APC (BD 341025; clone NCAM16.2). To identify the mature NK cells, FITC conjugated anti-KIR antibodies CD158a (BD 556062; clone HP3E4), CD158b (BD 559784; clone CH-L) and NKB1 (BD 555966; clone DX9) and PE conjugated antibody NKG2A (Beckman Coulter IM3291; clone Z199) were also added. Lymphocytes were identified by light scatter and NK cells were identified as CD56<sup>+</sup>CD3<sup>-</sup>. The NK cells were further gated into KIR<sup>+</sup>NKG2A<sup>+</sup>, KIR<sup>+</sup>NKG2A<sup>-</sup>, KIR<sup>-</sup>NKG2A<sup>+</sup> and KIR<sup>-</sup>NKG2A<sup>-</sup> quadrants. To identify T cell subsets, cells were stained with CD3 PerCP and CD56 APC, as above, along with CD4 FITC (BD 340133; clone SK3) and CD8 PE (BD 340046; clone SK1). T cells were identified as CD3<sup>-</sup>CD56<sup>+</sup> lymphocytes and further gated into CD4<sup>+</sup> and CD8<sup>+</sup> subsets.

**Table S1: Results of univariate regression**

| Covariate                                                         | Regression coefficient | SE   | 95%CI  |       | <i>P</i> |
|-------------------------------------------------------------------|------------------------|------|--------|-------|----------|
| <b>CD4<sup>+</sup> T cells (% of lymphocytes)</b>                 |                        |      |        |       |          |
| Graft source (reference: PB)                                      |                        |      |        |       |          |
| BM                                                                | -9.18                  | 1.72 | -12.57 | -5.79 | <.0001   |
| <b>CD8<sup>+</sup> T cells (% of lymphocytes)</b>                 |                        |      |        |       |          |
| Graft source (reference: PB)                                      |                        |      |        |       |          |
| BM                                                                | 0.76                   | 2.63 | -4.41  | 5.94  | 0.77     |
| <b>NK cells total (% of lymphocytes)</b>                          |                        |      |        |       |          |
| Graft source (reference: PB)                                      |                        |      |        |       |          |
| BM                                                                | 11.68                  | 3.25 | 5.28   | 18.07 | 0.0004   |
| <b>CD56<sup>bright</sup> NK cells (% of NK cells)<sup>1</sup></b> |                        |      |        |       |          |
| Graft source (reference: PB)                                      |                        |      |        |       |          |
| BM                                                                | 8.58                   | 2.44 | 3.78   | 13.38 | 0.0005   |
| <b>KIR<sup>+</sup>NKG2A<sup>-</sup> NK cells (% of NK cells)</b>  |                        |      |        |       |          |
| Graft source (reference: PB)                                      |                        |      |        |       |          |
| BM                                                                | -0.67                  | 1.96 | -4.52  | 3.19  | 0.73     |

<sup>1</sup>Because CD56<sup>bright</sup> NK cells (% of NK cells) and CD56<sup>dim</sup> NK cells (% of NK cells) add up to 100%, the regression models for the two are mathematically equivalent and only differ in the direction of the estimated regression coefficients of covariates. Therefore, only models for CD56<sup>bright</sup> NK cells are shown. BM: Bone marrow; CI: Confidence interval; NK: Natural killer; PB: Peripheral blood; SE: standard error

**Table S2: Results of multivariable regressions with graft source, CMV group, and their interaction, unadjusted or adjusted for grade II-IV acute GVHD by day 100**

| Covariate                                                                         | Regression coefficient | SE   | 95%CI  |       | P      |
|-----------------------------------------------------------------------------------|------------------------|------|--------|-------|--------|
| <b>CD4<sup>+</sup> T cells (% of lymphocytes)</b>                                 |                        |      |        |       |        |
| Graft source (reference: PB)<br>BM                                                | -6.65                  | 2.54 | -11.65 | -1.65 | 0.01   |
| CMV group (reference: CMV-)<br>CMVr                                               | -3.63                  | 4.99 | -13.46 | 6.19  | 0.09   |
| CMV+                                                                              | -1.22                  | 2.49 | -6.12  | 3.67  | 0.47   |
| Graft source x CMV group<br>BM x CMVr                                             | -3.38                  | 6.13 | -15.47 | 8.70  | 0.53   |
| BM x CMV+                                                                         | -4.02                  | 3.64 | -11.20 | 3.16  | 0.58   |
| <b>CD4<sup>+</sup> T cells (% of lymphocytes), adjusted for grade II-IV aGVHD</b> |                        |      |        |       |        |
| Graft source (reference: PB)<br>BM                                                | -6.76                  | 2.54 | -11.76 | -1.75 | 0.01   |
| CMV group (reference: CMV-)<br>CMVr                                               | -3.86                  | 5.00 | -13.70 | 5.99  | 0.10   |
| CMV+                                                                              | -1.11                  | 2.49 | -6.02  | 3.79  | 0.44   |
| Graft source x CMV group<br>BM x CMVr                                             | -3.07                  | 6.15 | -15.18 | 9.05  | 0.62   |
| BM x CMV+                                                                         | -3.97                  | 3.65 | -11.16 | 3.21  | 0.28   |
| aGVHD grade II-IV (reference: No)<br>Yes                                          | 1.41                   | 1.73 | -2.00  | 4.81  | 0.42   |
| <b>CD8<sup>+</sup> T cells (% of lymphocytes)</b>                                 |                        |      |        |       |        |
| Graft source (reference: PB)<br>BM                                                | -7.23                  | 3.61 | -14.34 | -0.11 | 0.05   |
| CMV group (reference: CMV-)<br>CMVr                                               | 10.18                  | 7.10 | -3.81  | 24.16 | <.0001 |
| CMV+                                                                              | 8.17                   | 3.54 | 1.21   | 15.14 | 0.15   |
| Graft source x CMV group<br>BM x CMVr                                             | 12.61                  | 8.73 | -4.59  | 29.80 | 0.02   |
| BM x CMV+                                                                         | 12.55                  | 5.18 | 2.33   | 22.76 | 0.04   |
| <b>CD8<sup>+</sup> T cells (% of lymphocytes), adjusted for grade II-IV aGVHD</b> |                        |      |        |       |        |
| Graft source (reference: PB)<br>BM                                                | -6.89                  | 3.60 | -13.98 | 0.19  | 0.06   |
| CMV group (reference: CMV-)<br>CMVr                                               | 10.89                  | 7.07 | -3.04  | 24.82 | <.0001 |
| CMV+                                                                              | 7.82                   | 3.52 | 0.88   | 14.77 | 0.12   |
| Graft source x CMV group<br>BM x CMVr                                             | 11.59                  | 8.70 | -5.56  | 28.73 | 0.03   |
| BM x CMV+                                                                         | 12.39                  | 5.16 | 2.23   | 22.56 | 0.05   |
| aGVHD grade II-IV (reference: No)<br>Yes                                          | -4.53                  | 2.45 | -9.35  | 0.29  | 0.18   |
| <b>NK cells total (% of lymphocytes)</b>                                          |                        |      |        |       |        |
| Graft source (reference: PB)<br>BM                                                | 16.61                  | 4.72 | 7.31   | 25.91 | 0.0005 |

|                                                                                                     |        |       |        |       |        |
|-----------------------------------------------------------------------------------------------------|--------|-------|--------|-------|--------|
| CMV group (reference: CMV-)                                                                         |        |       |        |       | 0.002  |
| CMVr                                                                                                | -5.35  | 9.28  | -23.64 | 12.93 | 0.56   |
| CMV+                                                                                                | -8.24  | 4.63  | -17.35 | 0.87  | 0.08   |
| Graft source x CMV group                                                                            |        |       |        |       | 0.48   |
| BM x CMVr                                                                                           | -10.19 | 11.34 | -32.54 | 12.16 | 0.37   |
| BM x CMV+                                                                                           | -7.10  | 6.78  | -20.46 | 6.25  | 0.30   |
| <b>NK cells total (% of lymphocytes), adjusted for grade II-IV aGVHD</b>                            |        |       |        |       |        |
| Graft source (reference: PB)                                                                        |        |       |        |       |        |
| BM                                                                                                  | 15.97  | 4.66  | 6.78   | 25.16 | 0.0007 |
| CMV group (reference: CMV-)                                                                         |        |       |        |       | 0.003  |
| CMVr                                                                                                | -6.73  | 9.17  | -24.79 | 11.34 | 0.46   |
| CMV+                                                                                                | -7.57  | 4.57  | -16.57 | 1.44  | 0.10   |
| Graft source x CMV group                                                                            |        |       |        |       | 0.54   |
| BM x CMVr                                                                                           | -8.04  | 11.22 | -30.14 | 14.07 | 0.47   |
| BM x CMV+                                                                                           | -6.81  | 6.69  | -19.99 | 6.37  | 0.31   |
| aGVHD grade II-IV (reference: No)                                                                   |        |       |        |       |        |
| Yes                                                                                                 | 8.68   | 3.17  | 2.44   | 14.92 | 0.01   |
| <b>CD56<sup>bright</sup> NK cells (% of NK cells)<sup>1</sup></b>                                   |        |       |        |       |        |
| Graft source (reference: PB)                                                                        |        |       |        |       |        |
| BM                                                                                                  | 11.86  | 3.56  | 4.84   | 18.87 | 0.001  |
| CMV group (reference: CMV-)                                                                         |        |       |        |       | 0.04   |
| CMVr                                                                                                | -2.96  | 7.00  | -16.75 | 10.83 | 0.67   |
| CMV+                                                                                                | -3.60  | 3.49  | -10.48 | 3.27  | 0.30   |
| Graft source x CMV group                                                                            |        |       |        |       | 0.30   |
| BM x CMVr                                                                                           | -13.29 | 8.56  | -30.14 | 3.57  | 0.12   |
| BM x CMV+                                                                                           | -2.06  | 5.11  | -12.14 | 8.01  | 0.69   |
| <b>N CD56<sup>bright</sup> NK cells (% of NK cells)<sup>1</sup>, adjusted for grade II-IV aGVHD</b> |        |       |        |       |        |
| Graft source (reference: PB)                                                                        |        |       |        |       |        |
| BM                                                                                                  | 11.80  | 3.57  | 4.76   | 18.83 | 0.001  |
| CMV group (reference: CMV-)                                                                         |        |       |        |       | 0.04   |
| CMVr                                                                                                | -3.09  | 7.02  | -16.93 | 10.75 | 0.66   |
| CMV+                                                                                                | -3.54  | 3.50  | -10.43 | 3.36  | 0.31   |
| Graft source x CMV group                                                                            |        |       |        |       | 0.32   |
| BM x CMVr                                                                                           | -13.08 | 8.59  | -30.01 | 3.85  | 0.13   |
| BM x CMV+                                                                                           | -2.04  | 5.12  | -12.13 | 8.06  | 0.69   |
| aGVHD grade II-IV (reference: No)                                                                   |        |       |        |       |        |
| Yes                                                                                                 | 0.84   | 2.43  | -3.94  | 5.61  | 0.73   |
| <b>KIR<sup>+</sup>NKG2A<sup>-</sup> NK cells (% of NK cells)</b>                                    |        |       |        |       |        |
| Graft source (reference: PB)                                                                        |        |       |        |       |        |
| BM                                                                                                  | -2.90  | 2.72  | -8.26  | 2.47  | 0.29   |
| CMV group (reference: CMV-)                                                                         |        |       |        |       | <.0001 |
| CMVr                                                                                                | 5.58   | 5.14  | -4.55  | 15.70 | 0.28   |
| CMV+                                                                                                | 8.38   | 2.63  | 3.20   | 13.57 | 0.00   |
| Graft source x CMV group                                                                            |        |       |        |       | 0.03   |
| BM x CMVr                                                                                           | 14.92  | 6.31  | 2.49   | 27.35 | 0.02   |
| BM x CMV+                                                                                           | -2.01  | 3.88  | -9.65  | 5.64  | 0.61   |
| <b>KIR<sup>+</sup>NKG2A<sup>-</sup> NK cells (% of NK cells), adjusted for grade II-IV aGVHD</b>    |        |       |        |       |        |

|                                          |       |      |       |       |       |
|------------------------------------------|-------|------|-------|-------|-------|
| Graft source (reference: PB)<br>BM       | -2.37 | 2.71 | -7.72 | 2.97  | 0.38  |
| CMV group (reference: CMV-)<br>CMVr      | 6.20  | 5.11 | -3.87 | 16.26 | 0.23  |
| CMV+                                     | 7.95  | 2.62 | 2.79  | 13.12 | 0.003 |
| Graft source x CMV group<br>BM x CMVr    | 13.72 | 6.28 | 1.34  | 26.11 | 0.03  |
| BM x CMV+                                | -2.30 | 3.85 | -9.89 | 5.29  | 0.55  |
| aGVHD grade II-IV (reference: No)<br>Yes | -3.86 | 1.83 | -7.47 | -0.26 | 0.04  |

<sup>1</sup>Because CD56<sup>bright</sup> NK cells (% of NK cells) and CD56<sup>dim</sup> NK cells (% of NK cells) add up to 100%, the regression models for the two are mathematically equivalent and only differ in the direction of the estimated regression coefficients of covariates. Therefore, only models for CD56<sup>bright</sup> NK cells are shown. aGVHD: acute graft-versus-host disease; BM: Bone marrow; CI: Confidence interval; CMV: Cytomegalovirus; CMVr, patients who reactivated CMV by day 100; CMV+, CMV-seropositive patients who did not reactivate CMV by day 100; CMV-, CMV-seronegative patients who did not reactivate CMV; NK: Natural killer; PB: Peripheral blood; SE: standard error

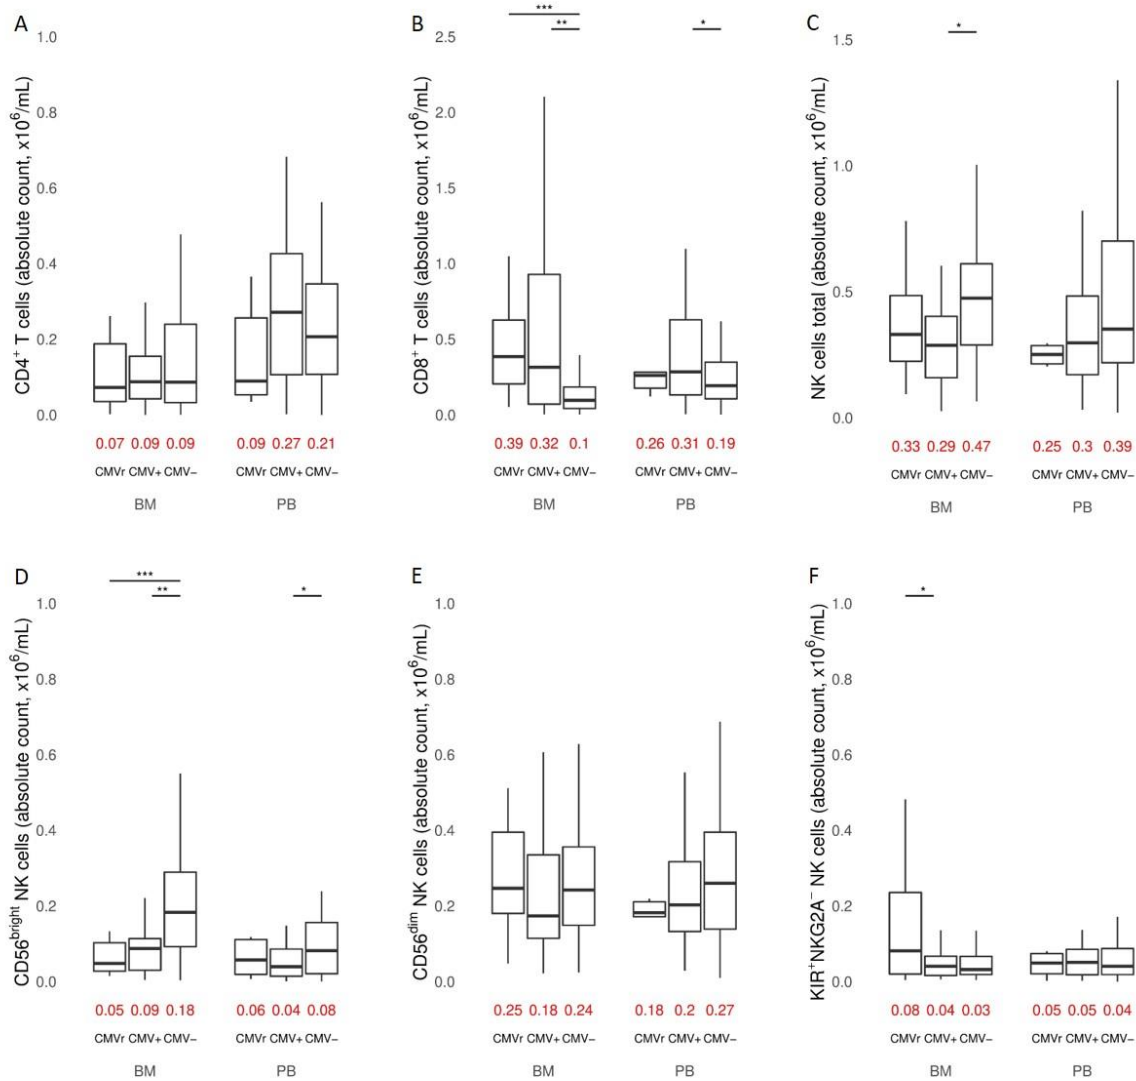

**Figure S1: Association of CMV reactivation with T- and NK-cell reconstitution at 100 days in unrelated donor allografts using bone marrow vs. peripheral blood as a graft source.** The absolute counts of (A) CD4<sup>+</sup> T cells, (B) CD8<sup>+</sup> T cells, and (C) total NK cells were determined based on a lymphocyte gate determined by forward and side scatter. The NK cells (CD56<sup>+</sup>/CD56<sup>-</sup> gate) were subsetted into (D) CD56<sup>bright</sup>, (E) CD56<sup>dim</sup>, and (F) KIR<sup>+</sup>NKG2A<sup>-</sup> NK cells in three groups based on CMV reactivation status and in bone marrow vs. peripheral blood groups, separately. Red numbers on the X-axis show medians. CMVr, patients who reactivated CMV by day 100; CMV+, CMV-seropositive patients who did not reactivate CMV by day 100; and CMV-, CMV-seronegative patients who did not reactivate CMV by day 100
